# Supplementary material for: Biomarkers and Proteomics in Sarcomeric Hypertrophic Cardiomyopathy in the Young—FGF-21 Highly Associated with Overt Disease
Source: MDPI journal article supplement (doi:10.3390/jcdd11040105), 2024-03-29
Supplement: s1 [file s1]

## Supplementary tables S1–5

**Table S1.** Biomarkers in respectively biological pathway.

| <b>Biomarkers in Immune response (38 proteins)</b>                                |                                                              |
|-----------------------------------------------------------------------------------|--------------------------------------------------------------|
| Tumor necrosis factor receptor superfamily member 13 B (TNFRSF13B)*               | Interleukin-1 receptor-like 2(IL1RL2)*                       |
| NF-kappa-B essential modulator (NEMO)*                                            | T-cell surface glycoprotein CD4 (CD4)*                       |
| Lymphotactin (XCL1)*                                                              | Interleukin-6 (IL6)*                                         |
| Low affinity immunoglobulin gamma Fc region receptor II-b (IgG Fc receptor II-b)* | C-C motif chemokine 3 (CCL3)*                                |
| Proto-oncogene tyrosine-protein kinase Src (SRC)*                                 | Interleukin-18 (IL-18)*                                      |
| Carcinoembryonic antigen-related cell adhesion molecule 8 (CEACAM8)*              | Galectin-9 (Gal-9)*                                          |
| Heme oxygenase 1 (HO-1)*                                                          | Polymeric immunoglobulin receptor (PIgR)*                    |
| Interleukin-4 receptor subunit alpha (IL-4RA)*                                    | SLAM family member 7 (SLAMF7)*                               |
| Tumor necrosis factor receptor superfamily member 10A (TNFRSF10A)*                | Interleukin-27 (IL-27)*                                      |
| Leptin (LEP)*                                                                     | Cathepsin L1 (CTSL1)*                                        |
| Tumor necrosis factor receptor superfamily member 11A (TNFRSF11A)*                | Angiopoietin-1 (ANGPT1)*                                     |
| Protein AMBP (AMBP)*                                                              | Spondin-2 (SPON2)*                                           |
| Macrophage receptor MARCO (MARCO)*                                                | SLAM family member 5 (CD84)*                                 |
| Pro-adrenomedullin (ADM)*                                                         | C-C motif chemokine 17 (CCL17)*                              |
| CD40 ligand (CD40-L)*                                                             | C-X-C motif chemokine 1 (CXCL1)*                             |
| A disintegrin and metalloproteinase with thrombospondin motifs 13 (ADAM-TS13)*    | Receptor for advanced glycosylation and products (RAGE)*     |
| Bone morphogenetic protein 6 (BMP-6)*                                             | Programmed cell death 1 ligand 2 (PD-L2)*                    |
| Osteoclast-associated immunoglobulin-like receptor (hOSCAR)*                      | Pentraxin-related protein PTX3 (PTX3)*                       |
| Pro-interleukin-16 (IL16)*                                                        | TNF-related apoptosis-inducing ligand receptor 2 (TRAIL-R2)* |
| <b>Biomarkers in Chemotaxis (17 proteins)</b>                                     |                                                              |
| Galectin-3 (Gal-3)†                                                               | Integrin beta-2 (ITGB2)†                                     |
| C-C motif chemokine 24 (CCL24)†                                                   | CD166 antigen (ALCAM)†                                       |
| Azurocidin (AZU1)†                                                                | C-C motif chemokine 16 (CCL16)†                              |
| Retinoic acid receptor responder protein 2 (RARRES2)†                             | Plasminogen activator inhibitor 1(PAI)†                      |
| Urokinase plasminogen activator surface receptor (U-PAR)†                         | Monocyte chemotactic protein 1 (MCP-1)†                      |
| C-C motif chemokine 15 (CCL15)†                                                   | Pulmonary surfactant-associated protein D (PSP-D)†           |
| Interleukin-6 receptor subunit alpha (IL-6RA)†                                    | C-X-C motif chemokine 16 (CXCL16)†                           |
| Urokinase-type plasminogen activator (uPA)†                                       | Interleukin-17 receptor A (IL-17RA)†                         |
| Platelet-derived growth factor subunit A (PDGF subunit A)†                        |                                                              |
| <b>Biomarkers in Angiogenesis (28 proteins)</b>                                   |                                                              |
| Growth/differentiation factor 2 (GDF-2)*                                          | Vascular endothelial growth factor D (VEGFD)*                |
| Angiopoietin-1 receptor (TIE2)*                                                   | Heme oxygenase 1 (HO-1)*                                     |
| Decorin (DCN)*                                                                    | Serine/threonine-protein kinase 4 (STK4)*                    |
| Placenta growth factor (PGF)*                                                     | Interleukin-6 (IL6)*                                         |
| Leptin (LEP)*                                                                     | Heat shock 27 kDa protein (HSP 27)*                          |
| Trombospondin-2 (THBS2)*                                                          | Interleukin-18 (IL-18)*                                      |
| Pro-adrenomedullin (ADM)*                                                         | Angiopoietin-1 (ANGPT1)*                                     |
| Natriuretic peptides B (BNP)*                                                     | Tissue factor (TF)*                                          |
| Perlecan (PLC)∧                                                                   | C-C motif chemokine 24 (CCL24)∧                              |
| Neurogenic locus notch homolog protein 3 (Notch 3)∧                               | Plasminogen activator inhibitor 1 (PAI)∧                     |
| Chitinase-3-like protein 1 (CHI3L1)∧                                              | Monocyte chemotactic protein 1 (MCP-1)∧                      |
| Integrin beta-2 (ITGB2)∧                                                          | Matrix metalloproteinase-2 (MMP-2)∧                          |
| Urokinase-type plasminogen activator (uPA)∧                                       | Aminopeptidase N (AP-N)∧                                     |
| Ephrin type-B receptor 4 (EPHB4)∧                                                 | Platelet-derived growth factor subunit A (PDGF subunit A)∧   |
| <b>Biomarkers in Response to hypoxia (17 proteins)</b>                            |                                                              |
| Vascular endothelial growth factor D (VEGFD)*                                     | Platelet-derived growth factor subunit B (PDGF subunit B)*   |
| Proto-oncogene tyrosine-protein kinase Src (SRC)*                                 | Angiopoietin-1 receptor (TIE2)*                              |
| Pro-adrenomedullin (ADM)*                                                         | Heme oxygenase 1 (HO-1)*                                     |
| Placenta growth factor (PGF)*                                                     | Leptin (LEP)*                                                |

Matrix metalloproteinase-2 (MMP-2)^  
Platelet-derived growth factor subunit A (PDGF subunit A)^  
Transferrin receptor protein 1 (TR)^  
Myoglobin (MB)^  
Tumor necrosis factor receptor superfamily member 6 (FAS)^

### Biomarkers in Inflammatory response (59 proteins)

Lymphotoctin (XCL1)\*  
Interleukin-1 receptor-like 2 (IL1RL2)\*  
Bone morphogenetic protein 6 (BMP-6)\*  
Lipoprotein lipase (LPL)\*  
Angiopoietin-1 receptor (TIE2)\*  
Leptin (LEP)\*  
Receptor for advanced glycosylation end products (RAGE)\*  
Lectin-like oxidized LDL receptor 1 (LOX-1)\*  
C-C motif chemokine 3 (CCL3)\*  
Tumor necrosis factor receptor superfamily member 11A (TNFRSF11A)\*  
Tumor necrosis factor receptor superfamily member 10A (TNFRSF10A)\*  
Interleukin-17D (IL-17D)\*  
C-C motif chemokine 17 (CCL17)\*  
Heme oxygenase 1 (HO-1)\*  
Tyrosine-protein kinase receptor UFO (AXL)^  
Interleukin-2 receptor subunit alpha (IL2-RA)^  
Transferrin receptor protein 1 (TR)^  
Osteopontin (OPN)^  
Tumor necrosis factor receptor superfamily member 14 (TNFRSF14)^  
Tartrate-resistant acid phosphatase type 5 (TR-AP)^  
Tumor necrosis factor receptor superfamily member 10C (TNFRSF10C)^  
Scavenger receptor cysteine-rich type 1 protein M130 (CD163)^  
Tumor necrosis factor receptor 2 (TNF-R2)^  
Retinoic acid receptor responder protein 2 (RARRES2)^  
Peptidoglycan recognition protein 1 (PGLYRP1)^  
P-selectin (SELP)^  
Azurocidin (AZU1)^  
Interleukin-6 receptor subunit alpha (IL-6RA)^  
Osteopontin (OPN)^  
Lymphotoxin-beta receptor (LTBR)^

Caspase-3 (CASP-3)^  
Monocyte chemotactic protein 1 (MCP-1)^  
Urokinase-type plasminogen activator (uPA)^  
Tissue-type plasminogen activator (t-PA)^

C-X-C motif chemokine 1 (CXCL1)\*  
Interleukin-4 receptor subunit alpha (IL-4RA)\*  
Interleukin-6 (IL6)\*  
Pentraxin-related protein PTX3 (PTX3)\*  
CD40 ligand (CD40-L)\*  
TNF-related apoptosis-inducing ligand receptor 2 (TRAIL-R2)\*  
Interleukin-18 (IL-18)\*  
Proteinase-activated receptor 1 (PAR-1)\*  
Tissue factor (TF)\*  
Interleukin-27 (IL-27)\*

Galectin-9 (Gal-9)\*

NF-kappa-B essential modulator (NEMO)\*  
Interleukin-1 receptor antagonist protein (IL-1ra)\*  
Angiotensin-converting enzyme 2 (ACE2)\*  
Monocyte chemotactic protein 1 (MCP-1)^  
C-C motif chemokine 16 (CCL16)^  
Integrin beta-2 (ITGB2)^  
Tumor necrosis factor receptor 1 (TNF-R1)^  
E-selectin (SELE)^

Plasminogen activator inhibitor 1 (PAI)^  
C-C motif chemokine 15 (CCL15)^

Fatty acid-binding protein, adipocyte (FABP4)^  
ST2 protein (ST2)^  
C-C motif chemokine 24 (CCL24)^  
Junctional adhesion molecule A (JAM-A)^  
Tumor necrosis factor receptor superfamily member 6 (FAS)^  
Chitinase-3-like protein 1 (CHI3L1)^  
Interleukin-1 receptor type 1 (IL-1RT1)^  
Interleukin-17 receptor A (IL-17RA)^

### Biomarkers in Cell adhesion (62 proteins)

Receptor for advanced glycosylation end products (RAGE)\*  
Interleukin-6 (IL-6)\*  
Galectin-9 (Gal-9)\*  
Protein-glutamine gamma-glutamyltransferase 2 (TGM2)\*  
Interleukin-18 (IL-18)\*  
Lymphotoctin (XCL1)\*  
Programmed cell death 1 ligand 2 (PD-L2)\*  
P-selectin glycoprotein ligand 1 (PSGL-1)\*  
Stem cell factor (SCF)\*

Heat shock 27 kDa protein (HSP 27)\*  
Interleukin-4 receptor subunit alpha (IL-4RA)\*  
Angiopoietin-1 (ANGPT1)\*  
Tyrosine-protein kinase Mer (MERTK)\*  
Brother of DKO (BOC)\*  
Thrombospondin-2 (THBS2)\*  
Urokinase-type plasminogen activator (uPA)^  
Collagen alpha-1 (I) chain (COL1A1)^  
Von Willebrand factor (vWF)^  
Tyrosine-protein kinase receptor UFO (AXL)^  
Cadherin-5 (CDH5)^  
Interleukin-2 receptor subunit alpha (IL2-RA)^  
Intercellular adhesion molecule 2 (ICAM-2)^

T-cell surface glycoprotein CD4 (CD4)\*  
CD40 ligand (CD40-L)\*  
Proto-oncogene tyrosine-protein kinase Src (SRC)\*  
Angiopoietin-1 receptor (TIE2)\*  
Leptin (LEP)\*  
SLAM family member 7 (SLAMF7)\*  
Interleukin-27 (IL-27)\*  
Interleukin-1 receptor antagonist protein (IL-1ra)\*  
A disintegrin and metalloproteinase with thrombospondin motifs 13 (ADAM-TS13)\*  
Lectin-like oxidized LDL receptor 1 (LOX-1)\*  
Interleukin-1 receptor-like 2 (IL1RL2)\*  
Protein AMBP (AMBP)\*  
Spondin-2 (SPON2)\*  
SLAM family member 5 (CD84)\*  
Trem-like transcript 2 protein (TLT-2)^  
Caspase-3 (CASP-3)^  
Integrin beta-2 (ITGB2)^  
Galectin-3 (Gal-3)^  
P-selectin (SELP)^  
Ephrin type-B receptor 4 (EPHB4)^  
Epithelial cell adhesion molecule (Ep-CAM)^  
Epidermal growth factor receptor (EGFR)^

E-selectin (SELE)^  
CD166 antigen (ALCAM)^

Complement component C1q receptor (CD93)^  
Monocyte chemotactic protein 1 (MCP-1)^  
Insulin-like growth factor-binding protein 2 (IGFBP-2)^  
Platelet endothelial cell adhesion molecule (PECAM-1)^  
Contactin-1 (CNTN1)^  
Tumor necrosis factor superfamily member 14 (TNFRSF14)^  
Galectin-4 (Gal-4)^

#### **Biomarkers in Proteolysis (34 proteins)**

Proto-oncogene tyrosine-protein kinase Src (SRC)\*  
A disintegrin and metalloproteinase with thrombospondin motifs 13 (ADAM-TS13)\*  
Lectin-like oxidase LDL receptor 1 (LOX-1)\*  
Chymotrypsin C (CTRC)\*

Renin (REN)\*  
Proteinase-activated receptor 1 (PAR-1)\*  
TNF-related apoptosis-inducing ligand receptor 2 (TRAIL-R2)\*  
Angiotensin-converting enzyme 2 (ACE2)\*  
Cathepsin Z (CTS2)^  
Tissue-type plasminogen activator (t-PA)^  
Metalloproteinase inhibitor 4 (TIMP4)^  
Urokinase-type plasminogen activator (uPA)^  
Tumor necrosis factor receptor 2 (TNF-R2)^  
Matrix metalloproteinase-3 (MMP-3)^  
Caspase-3 (CASP-3)^  
Urokinase plasminogen activator surface receptor (U-PAR)^  
Matrix metalloproteinase-9 (MMP-9)^

#### **Biomarkers in Catabolic process (43 proteins)**

Matrix metalloproteinase-7 (MMP7)\*  
Decorin (DCN)\*  
Fatty acid-binding protein, intestinal (FABP2)\*  
2,4-dienoyl-CoA reductase, mitochondrial (DECR1)\*  
Brother of CDO (BOC)\*  
Fibroblast growth factor 23 (FGF23)\*  
Receptor for advanced glycosylation end products (RAGE)\*  
A disintegrin and metalloproteinase with thrombospondin motifs 13 (ADAM-TS13)\*  
Angiotensin-converting enzyme 2 (ACE2)\*  
Lipoprotein lipase (LPL)\*  
Cathepsin D (CTSD)^  
Cathepsin Z (CTS2)^  
Fatty acid-binding protein, adipocyte (FABP4)^  
Proprotein convertase subtilisin/kexin type 9 (PCSK9)^  
Peptidoglycan recognition protein 1 (PGLYRP1)^  
Chitotriosidase-1 (CHIT1)^  
Collagen alpha-1 (I) chain (COL1A1)^  
Aminopeptidase N (AP-N)^  
Kallikrein-6 (KLK6)^  
Retinoic acid receptor responder protein 2 (RARRES2)^  
Complement component C1q receptor (CD93)^  
Matrix metalloproteinase-9 (MMP-9)^

#### **Biomarkers in Ras-MAPK pathway (40 proteins)**

NF-kappa-B essential modulator (NEMO)\*  
Stem cell factor (SCF)\*  
Growth/differentiation factor 2 (GDF-2)\*  
C-C motif chemokine 3 (CCL3)\*  
Proteinase-activated receptor 1 (PAR-1)\*  
Renin (REN)\*

Thrombopoietin (THPO)\*

Osteopontin (OPN)^  
Tyrosine-protein phosphatase non-receptor type substrate 1 (SHPS-1)^  
Tumor necrosis factor receptor superfamily member 6 (FAS)^  
Plasminogen activator inhibitor 1 (PAI)^  
Insulin-like growth factor-binding protein 7 (IGFBP-7)^  
Pulmonary surfactant-associated protein D (PSP-D)^  
Tartrate-resistant acid phosphatase type 5 (TR-AP)^  
Spondin-1 (SPON1)^  
Azurocidin (AZU1)^

Poly (ADP-ribose) polymerase 1 (PARP-1)\*  
Tissue factor (TF)\*

Matrix metalloproteinase-12 (MMP-12)\*  
Tumor necrosis factor receptor superfamily member 10A (TNFRSF10A)\*  
Interleukin-6 (IL6)\*  
CathepsinL1 (CTSL1)\*  
Matrix metalloproteinase-7 (MMP-7)\*  
Galectin-9 (Gal-9)\*  
Tumor necrosis factor receptor superfamily member 6 (FAS)^  
Carboxypeptidase A1 (CPA1)^  
Proprotein convertase subtilisin/kexin type 9 (PCSK9)^  
Bleomycin hydrolase (BLM hydrolase)^  
Kallikrein-6 (KLK6)^  
Plasminogen activator inhibitor 1 (PAI)^  
Cystatin-B (CSTB)^  
Azurocidin (AZU1)^  
Matrix metalloproteinase-2 (MMP-2)^

Alpha-L-iduronidase (IDUA)\*  
Protein AMBP (AMBP)\*  
Heme oxygenase 1 (HO1)\*  
Cathepsin L1 (CTSL1)\*  
Gastrotropin (GT)\*  
Hydroxyacid oxidase 1 (HAOX1)\*  
Leptin (LEP)\*  
Heat shock 27 kDa protein (HSP 27)\*

Matrix metalloproteinase-12 (MMP-12)\*  
Prolargin (PRELP)\*  
Perlecan (PLC)^  
Low-density lipoprotein receptor (LDL receptor)^  
Caspase-3 (CASP-3)^  
Paraoxonase (PON3)^  
Myeloblastin (PRTN3)^  
Metalloproteinase inhibitor 4 (TIMP4)^  
Matrix metalloproteinase-2 (MMP-2)^  
Tumor necrosis factor receptor 2 (TNF-R2)^  
Matrix metalloproteinase-3 (MMP-3)^  
Epidermal growth factor receptor (EGFR)^  
Myeloperoxidase (MPO)^

Proheparin-binding EGF-like growth factor (HB-EGF)\*  
Platelet-derived growth factor subunit B (PDGF subunit B)\*  
Angiopoietin-1 (ANGPT1)\*  
Angiopoietin-1 receptor (TIE2)\*  
Leptin (LEP)\*  
Tumor necrosis factor receptor superfamily member 11A (TNFRSF11A)\*  
Fibroblast growth factor 21 (FGF21)\*

|                                                                  |                                                            |
|------------------------------------------------------------------|------------------------------------------------------------|
| Galectin-9 (Gal-9)*                                              | Proto-oncogene tyrosine-protein kinase Src (SRC)*          |
| Growth hormone (GH)*                                             | Lymphotactin (XCL1)*                                       |
| Fibroblast growth factor 23 (FGF-23)*                            | C-C motif chemokine 17 (CCL17)*                            |
| Interleukin-18 (IL-18)*                                          | Bone morphogenetic protein 6 (BMP-6)*                      |
| Interleukin-6 (IL6)*                                             | Protein AMBP (AMBP)*                                       |
| CD40 ligand (CD40-L)*                                            | Monocyte chemotactic protein 1 (MCP-1)^                    |
| Tumor necrosis factor receptor 2 (TNF-R2)^                       | C-C motif chemokine 24 (CCL24)^                            |
| Interleukin-2 receptor subunit alpha (IL2-RA)^                   | Growth/differentiation factor 15 (GDF-15)^                 |
| Epidermal growth factor receptor (EGFR)^                         | Platelet-derived growth factor subunit A (PDGF subunit A)^ |
| Tumor necrosis factor receptor superfamily member 14 (TNFRSF14)^ | Tumor necrosis factor receptor superfamily member 6 (FAS)^ |
| Chitinase-3-like protein 1 (CHI3L1)^                             | Lymphotoxin-beta receptor (LTBR)^                          |
| C-C motif chemokine 16 (CCL16)^                                  | Osteoprotegerin (OPG)^                                     |
| Interleukin-6 receptor subunit alpha (IL-6RA)^                   | C-C motif chemokine 15 (CCL15)^                            |

\* = Included in CVD II; † = Included in CVD III

**Table S2.** The genetic variants observed in the patients recruited from Paediatric Heart Centre in Lund, Sweden between 2009-2018. The analytical report was issued by an accredited laboratory according to internationally recognised standards, and the variants was determined pathogenic or likely pathogenic at the time for the analyse.

| Status | Gene                 | position                     | GnomAD version 4.0 | Alleles |
|--------|----------------------|------------------------------|--------------------|---------|
| HCM    | MYBPC3 NM_000256.3   | c.3697T>C p.(Gln1233ter )    | 0.000009579        | 14      |
| HCM    | MYBPC3 NM_000256.3   | c.3697T>C p.(Gln1233ter )    | 0.000009579        | 14      |
| HCM    | MYBPC3 NM_000256.3   | c.1803del p.(Thr602Profs)*61 | 0                  | 0       |
| HCM    | MYBPC3*              |                              |                    |         |
| HCM    | MYBPC3 NM_000256.3   | c.3697T>C p.(Gln1233ter )    | 0.000009579        | 14      |
| HCM    | unknown              |                              |                    |         |
| G+P-   | MYBPC3 NM_000256.3   | c.2429G>A p.(Arg810His)      | 0.00007188         | 116     |
| G+P-   | TNNT2 NM_001001430.3 | c.856 C>T p.(Arg286Cys)      | 0.0024692          | 6       |
| G+P-   | TNNT2 NM_001001430.3 | c.856 C>T p.(Arg286Cys)      | 0.0024692          | 6       |
| G+P-   | MYBPC3 NM_000256.3   | c.2429G>A p.(Arg810His)      | 0.00007188         | 116     |
| HCM    | unknown              |                              |                    |         |
| G+P-   | MYBPC3 NM_000256.3   | c.1505G>A p.(Arg502Gln)      | 0                  | 0       |
| HCM    | MYH7 NM_000257.3     | c.746 G>A p.(arg249Gln)      | 0                  | 0       |
| HCM    | unknown              |                              |                    |         |
| G+P-   | MYH7 NM_000257.3     | c.5135 G>A p.(Arg1712Gln)    | 0.00001673         | 27      |
| HCM    | TCAP NM_003673.4     | c.316C>T p.(Arg106Cys)       | 0                  | 0       |
| HCM    | MYBPC3 NM_000256.3   | c..2490dup p.(His831Serfs*2) | 0.000003718        | 6       |
| HCM    | MYBPC3 NM_000256.3   | c..2490dup p.(His831Serfs*2) | 0.000003718        | 6       |
| HCM    | MYBPC3 NM_000256.3   | c..2490dup p.(His831Serfs*2) | 0.000003718        | 6       |
| HCM    | MYBPC3 NM_000256.3   | c..2490dup p.(His831Serfs*2) | 0.000003718        | 6       |
| HCM    | MYBPC3 NM_000256.3   | c.2320G>A p.(Ala774Thr)      | 0.00002772         | 43      |
| G+P-   | TNNT2 NM_001001430.3 | c.856C>T, p.(Arg286Cys)      |                    |         |
| HCM    | MYH7 NM_000257.4     | c.1207 C>T p.(Arg403Trp)     | 0                  | 0       |

|      |                    |                               |             |    |
|------|--------------------|-------------------------------|-------------|----|
| HCM  | MYH7 NM_000257.4** | c.2155 C>G p.(Arg719Gly)      | 0           | 0  |
| G+P- | MYBPC3 NM_000256.3 | c.1658del, p.(Asp553Alafs2*)  | 0           | 0  |
| G+P- | MYBPC3 NM_000256.3 | c.1658del, p.(Asp553Alafs2*)  | 0           | 0  |
| HCM  | ABCC9 NM_005691.3  | c.3275 T>G p.Ile1092Ser       | 0.00002231  | 36 |
| G+P- | MYBPC3 NM_000256.3 | c.710 A>C p.(Tyr237Ser)       | 0           | 0  |
| HCM  | MYH7 NM_000257.4   | c.1988 G>A p.(Arg663His)      | 0.000009916 | 16 |
| G+P- | MYH7 NM_000257.4   | c.1988 G>A p.(Arg663His)      | 0.000009916 | 16 |
| HCM  | MYH7 NM_000257.4   | c.1988 G>A p.(Arg663His)      | 0.000009916 | 16 |
| HCM  | TNNI3***           |                               |             |    |
| HCM  | MYBPC3 NM_000256.3 | c.2373dupG p.(Trp792Valf41*)  | 0.00002686  | 42 |
| HCM  | MYBPC3 NM_000256.3 | c.2373dupG p.(Trp792Valf541*) | 0.00002686  | 42 |
| G+P- | MYBPC3 NM_000256.3 | c.2429G>A p.(Arg810His)       | 0           | 0  |
| G+P- | MYH7 NM_000257.4   | c.1063 G>A p.(Ala355Thr9      | 0           | 0  |
| G+P- | MYH7 NM_000257.4   | c.1063 G>A p.(Ala355Thr)      | 0           | 0  |
| G+P- | MYH7 NM_000257.4   | c.1063 G>A p.(Ala355Thr)      | 0           | 0  |
| HCM  | PRKAG2 NM_016203.4 | c.1589 A>G p.(His530Arg)      | 0           | 0  |
| HCM  | MYBPC3 NM_000256.3 | c.2373dupG p.(Trp792Valfx41*) | 0.00002686  | 42 |
| HCM  | MYBPC3 NM_000256.3 | c.2373dupG p.(Trp792Valfs41*) | 0.00002686  | 42 |
| HCM  | unknown            |                               |             |    |
| HCM  | unknown            |                               |             |    |
| G+P- | MYH7 NM_000257.4   | c.427 C>T p. (Arg143Trp)      | 0.00001239  | 20 |
| G+P- | MYH7 NM_000257.4   | c.427 C>T p. (Arg143Trp)      | 0.00001239  | 20 |
| G+P- | MYBPC3 NM_000256.3 | c.2670G>A p.(Trp890Ter)       | 0           | 0  |
| HCM  | MYH7 NM_000257.4   | c.5135 G>A p.(Arg1712Gln)     | 0.00001673  | 27 |

\* Original answer from 2005, not convertible to updated nomenclature; \*\* A secondary gene in MYBPC3 reported; \*\*\* No original answer available.

**Table S3.** Clinical markers compared between HCM and age- and sex-matched controls (Matched Controls) and between genotype-positive, phenotype-negative (G+P-) individuals and age- and sex-matched controls (Matched Controls) presented as mean and standard deviation (SD).

| Clinical markers             | HCM<br>(n=29) | Matched Controls<br>(n=29) | p-value* | G+P-<br>(n=17) | Matched Controls<br>(n=17) | p-value* |
|------------------------------|---------------|----------------------------|----------|----------------|----------------------------|----------|
| <b>CK-MB</b><br>ug/L (<5)    | 2.9 (2.0)     | 2.3 (1.8)                  | 0.212    | 2.7 (1.3)      | 3.2 (5.5)                  | 0.810    |
| <b>ASAT</b><br>ukat/L (<0.6) | 0.5 (0.1)     | 0.5 (0.3)                  | 0.991    | 0.5 (0.1)      | 0.5 (0.4)                  | 0.547    |
| <b>ALAT</b><br>ukat/L (<0.6) | 0.3 (0.1)     | 0.2 (0.1)                  | 0.211    | 0.2 (0.06)     | 0.2 (0.08)                 | 0.702    |



|                                                                                  |              |              |                                      |       |                    |       |
|----------------------------------------------------------------------------------|--------------|--------------|--------------------------------------|-------|--------------------|-------|
| ADM                                                                              | 8.15 (0.70)  | 7.75 (0.75)  | 5.1<br>(1.54-17.0)                   | 0.008 |                    | n.s   |
| MMP-2                                                                            | 4.47 (0.45)  | 4.69 (0.64)  | 0.093<br>(0.016-0.54)                | 0.008 |                    | n.s   |
| <b>Significant proteins remaining in Chemotaxis (17 proteins analysed)*</b>      |              |              |                                      |       |                    |       |
| IL-6RA                                                                           | 12.87 (0.74) | 13.26 (0.51) | 0.22<br>(0.06-0.81)                  | 0.022 |                    | n.s.  |
| <b>Significant proteins remaining in Immune response (38 proteins analysed)*</b> |              |              |                                      |       |                    |       |
| PIgR                                                                             | 7.13 (0.40)  | 6.96 (0.26)  | 33427<br>(15-71010299)               | 0.008 |                    | n.s.  |
| Gal-9                                                                            | 9.36 (0.44)  | 9.02 (0.48)  | 60.6<br>(1.12-3275.2)                | 0.044 | 5.91<br>(1.8-19.8) | 0.004 |
| PD-L2                                                                            | 3.16 (0.81)  | 3.23 (0.67)  | 0.023<br>(0.001-0.55)                | 0.020 |                    | n.s.  |
| hOSCAR                                                                           | 10.89 (0.38) | 10.92 (0.36) | 0.002<br>("0"-0.45)                  | 0.025 |                    | n.s.  |
| <b>Significant proteins remaining in Angiogenesis (28 proteins analysed)*</b>    |              |              |                                      |       |                    |       |
| DCN                                                                              | 5.37 (0.51)  | 5.21 (0.42)  | 133.5<br>(1.0-17420)                 | 0.049 |                    | n.s.  |
| PAI                                                                              | 4.64 (2.28)  | 4.45 (1.33)  | 40.5<br>(1.9-873.7)                  | 0.018 |                    | n.s.  |
| MMP-2                                                                            | 4.47 (0.45)  | 4.69 (0.63)  | 6.1*10 <sup>-6</sup><br>("0" – 0.03) | 0.005 |                    | n.s.  |
| ITGB2                                                                            | 6.83 (0.48)  | 6.74 (0.95)  | 164.6<br>(1.8-14871)                 | 0.026 |                    | n.s.  |

\* NPX = normalized protein expression values, Olink Proteomics' arbitrary unit on log2 scale, presented as median values and inter quartile range; "0" = <0.001; p^ = p value <0.05 was considered statistically significant; n.s.=non-significant.

**Table S5.** Descriptive statistic and multivariable logistic regression models, adjusted for age and sex, in pathophysiological pathways when comparing phenotype-negative, genotype-positive individuals (G+P-) (n=17) with age- and sex-matched controls (Matched Controls) (n=17) in each model. Significant proteins in each pathway are presented as increased or decreased OR for G+P-. Significant proteins are dichotomized above or below the median value of each protein in the control groups and included in a binary logistic regression model, adjusted for age and sex, for each pathway.

|                                                                             | G+P-<br>(n=17) | Matched controls<br>(n=17) | Model with continues<br>protein values<br>OR (95% CI) | p-value^ | Model with<br>dichotomized protein<br>values<br>OR (95% CI) | p-value^ |
|-----------------------------------------------------------------------------|----------------|----------------------------|-------------------------------------------------------|----------|-------------------------------------------------------------|----------|
| <b>Significant proteins remaining in Chemotaxis (17 proteins analysed)*</b> |                |                            |                                                       |          |                                                             |          |
| ALCAM                                                                       | 6.13 (0.58)    | 6.32 ((0.96)               | 0.047<br>(0.004-0.62)                                 | 0.017    |                                                             | n.s.     |

| Significant proteins remaining in Immune response (38 proteins analysed)* |             |             |                                          |              |                       |              |
|---------------------------------------------------------------------------|-------------|-------------|------------------------------------------|--------------|-----------------------|--------------|
| ADAM-TS13                                                                 | 6.52 (0.32) | 6.22 (0.32) | 598<br>(5.8-61607)                       | <b>0.007</b> | 11.2<br>(1.2-105)     | <b>0.034</b> |
| Significant proteins remaining in Angiogenesis (28 proteins analysed)*    |             |             |                                          |              |                       |              |
| TIE2                                                                      | 8.66 (0.43) | 8.31 (0.85) | 200.0<br>(1.1-37978)                     | <b>0.048</b> | 65.5<br>(3.7-1165)    | <b>0.004</b> |
| AP-N                                                                      | 5.72 (0.54) | 6.02 (0.70) | 0.0<br>("0"-0.28)                        | <b>0.019</b> | 0.08<br>(0.008-0.81)  | <b>0.032</b> |
| Significant proteins remaining in Proteolysis (34 proteins analysed)*     |             |             |                                          |              |                       |              |
| TIMP4                                                                     | 3.59 (0.85) | 4.15 (0.60) | 1.44*10 <sup>-8</sup><br>("0"-0.5)       | <b>0.042</b> | 0.056<br>(0.006-0.54) | <b>0.013</b> |
| PAI                                                                       | 3.80 (1.60) | 4.58 (1.53) | 0.005<br>("0"-0.6)                       | <b>0.030</b> | 0.084<br>(0.009-0.80) | <b>0.031</b> |
| U-PAR                                                                     | 5.77 (0.41) | 6.02 (0.80) | 4986370<br>(2.86-8.7*10 <sup>+12</sup> ) | <b>0.035</b> |                       | n.s.         |

\* NPX=normalized protein expression values, Olink Proteomics' arbitrary unit on log2 scale, presented as median values and inter quartile range; "0" = <0.001; p^ = p value <0.05 was considered statistically significant; n.s.=non-significant.
